# Supplementary material for: Habitat-driven variation in mycorrhizal communities in the terrestrial orchid genus Dactylorhiza
Source: PubMed Central journal article supplement (PMC5121631; doi:10.1038/srep37182), 2016-11-24
Supplement: srep37182-s1.pdf [file srep37182-s1.pdf]

# Habitat-driven variation in mycorrhizal communities in the terrestrial orchid genus *Dactylorhiza*

## Supporting Information

Hans Jacquemyn<sup>1\*</sup>, Michael Waud<sup>1,2</sup>, Vincent S. F. T. Merckx<sup>3</sup>, Rein Brys<sup>1</sup>, Daniel Tyteca<sup>4</sup>,  
Mikael Hedrén<sup>5</sup>, Bart Lievens<sup>2</sup>

<sup>1</sup>*KU Leuven, Department of Biology, Plant Conservation and Population Biology, B-3001 Leuven, Belgium*

<sup>2</sup>*KU Leuven, Campus De Nayer, Department of Microbial and Molecular Systems (M<sup>2</sup>S), Laboratory for Process Microbial Ecology and Bioinspirational Management (PME&BIM), B-2860 Sint-Katelijne-Waver, Belgium*

<sup>3</sup>*Naturalis Biodiversity Center, Leiden University, Leiden, the Netherlands*

<sup>4</sup>*Biodiversity Research Centre (BDIV), Université Catholique de Louvain, 1348 Louvain-la-Neuve, Belgium*

<sup>5</sup>*Department of Biology, Biodiversity, Lund University, Sölvegatan 37, S-22362 Lund, Sweden*

\*Correspondence author. E-mail: [hans.jacquemyn@bio.kuleuven.be](mailto:hans.jacquemyn@bio.kuleuven.be)

**Fig. S1** Highest likelihood tree obtained with the Maximum Likelihood analyses of the Tulasnellaceae dataset. Bootstrap support values of  $\geq 50\%$  are shown next to the nodes. Bar represents 0.5 substitutions per site.

**Fig. S2** Highest likelihood tree obtained with the Maximum Likelihood analyses of the Ceratobasidiaceae dataset. Bootstrap support values of  $\geq 50\%$  are shown next to the nodes. Bar represents 0.5 substitutions per site.

**Fig. S3** Highest likelihood tree obtained with the Maximum Likelihood analyses of the Sebacinaceae dataset. Bootstrap support values of  $\geq 50\%$  are shown next to the nodes. Bar represents 0.2 substitutions per site.

**Fig. S4** Highest likelihood tree obtained with the Maximum Likelihood analyses of the Thelephoraceae dataset. Bootstrap support values of  $\geq 50\%$  are shown next to the nodes. Bar represents 0.3 substitutions per site.

**Fig. S5** Number of operational taxonomic units (OTUs) of the four main orchid mycorrhizal families (Tulasnellaceae, Ceratobasidiaceae, Sebacinaceae and Thelephoraceae) obtained from the roots of 117 individuals of fourteen *Dactylorhiza* species collected in 35 populations across Europe.

**Fig. S6** Partitioning of mycorrhizal fungi across diploid, triploid and tetraploid *Dactylorhiza* species. Nonmetric multidimensional scaling (NMDS) plot of mycorrhizal fungi detected in fourteen different *Dactylorhiza* species sampled in 35 populations across Europe. Each point denotes a different *Dactylorhiza* species.

**Fig. S7** Map showing the locations of all sampled populations of fourteen different *Dactylorhiza* species in Europe. The map was created using ArcGis 9.0 ([www.esri.com](http://www.esri.com)) and was subsequently edited in Adobe Photoshop ([www.adobe.com](http://www.adobe.com)).

**Table S1** List of operational taxonomic units (OTUs) corresponding to orchid-associating mycorrhizal families discovered in this study.

**Table S2** Overview of surveyed *Dactylorhiza* species and populations.

Fig. S1

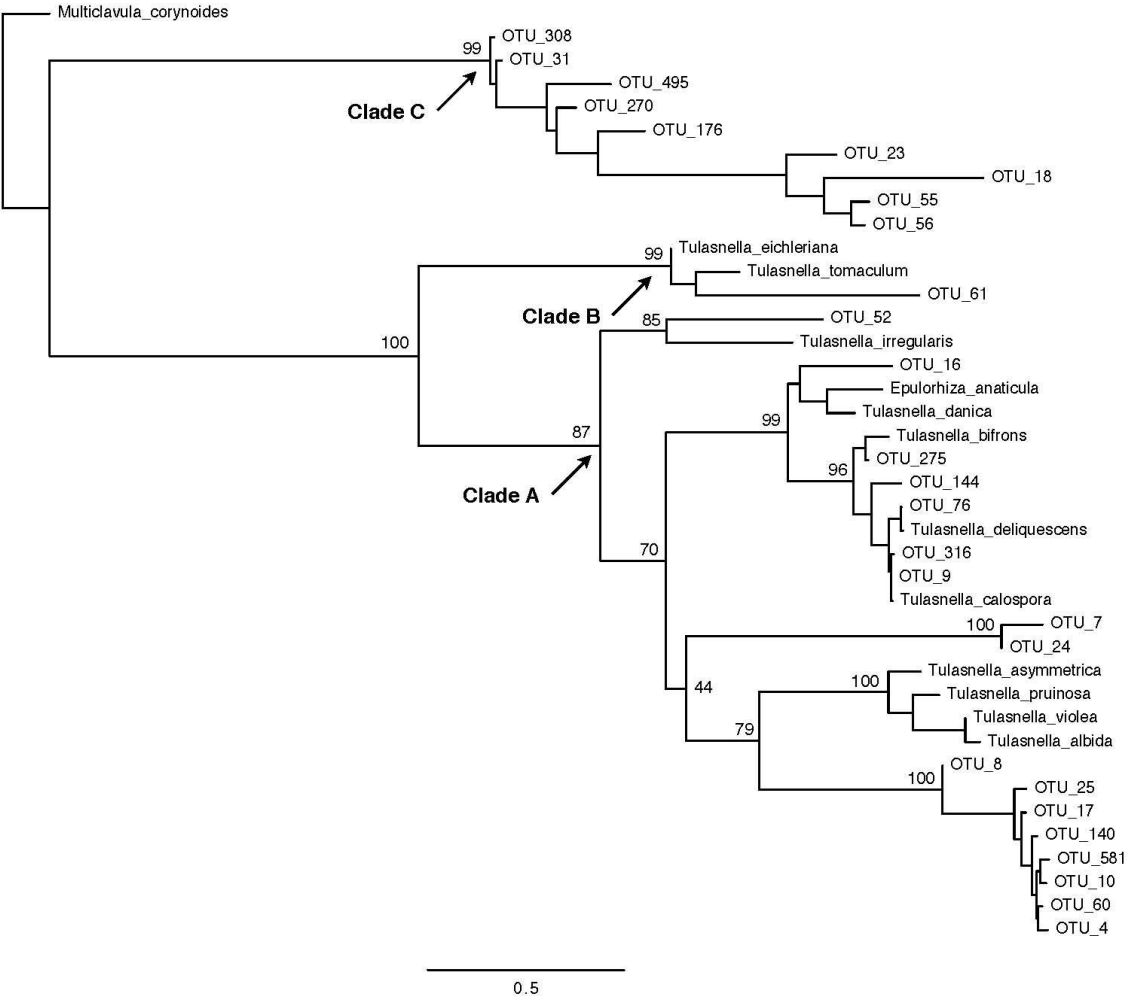

Fig. S2

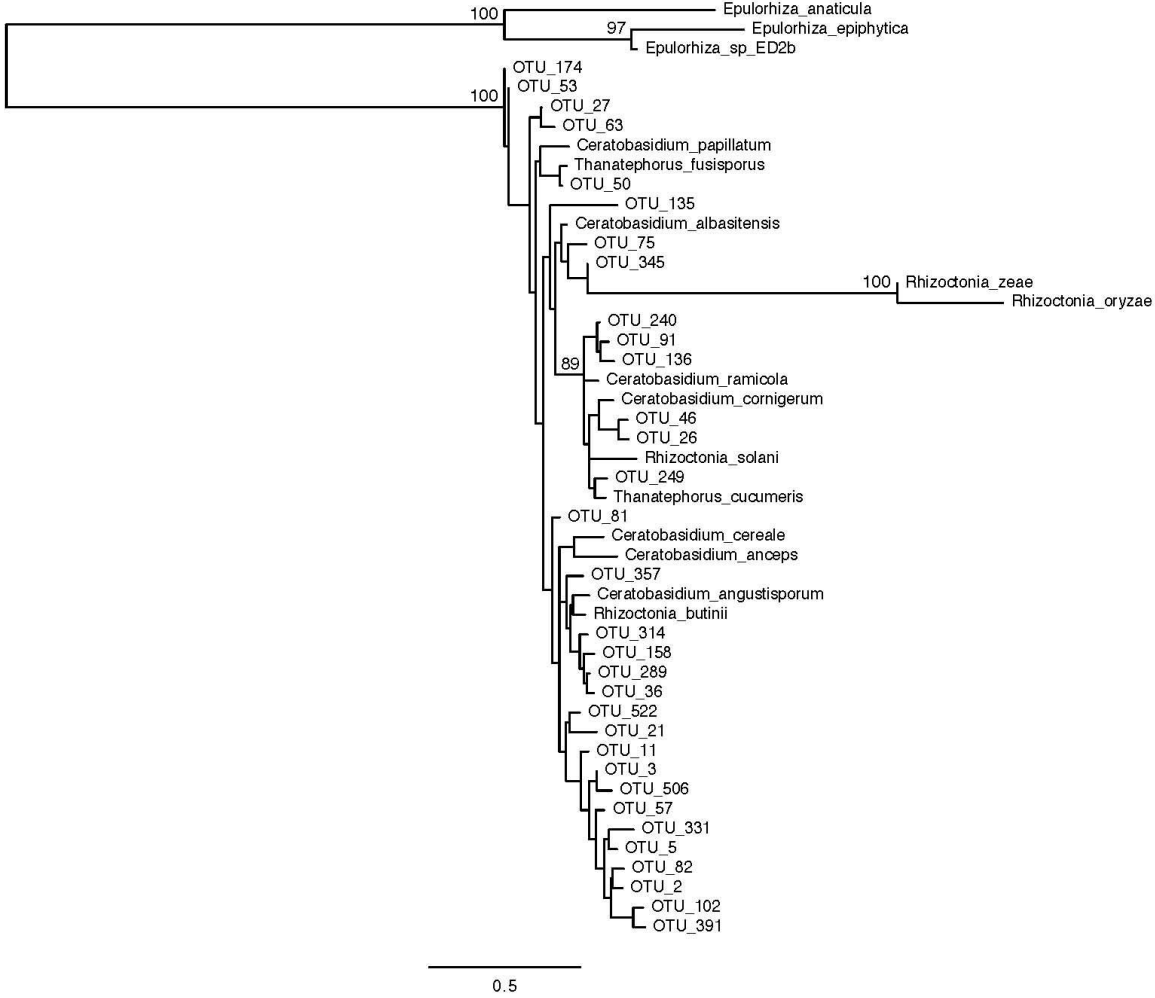

Fig. S3

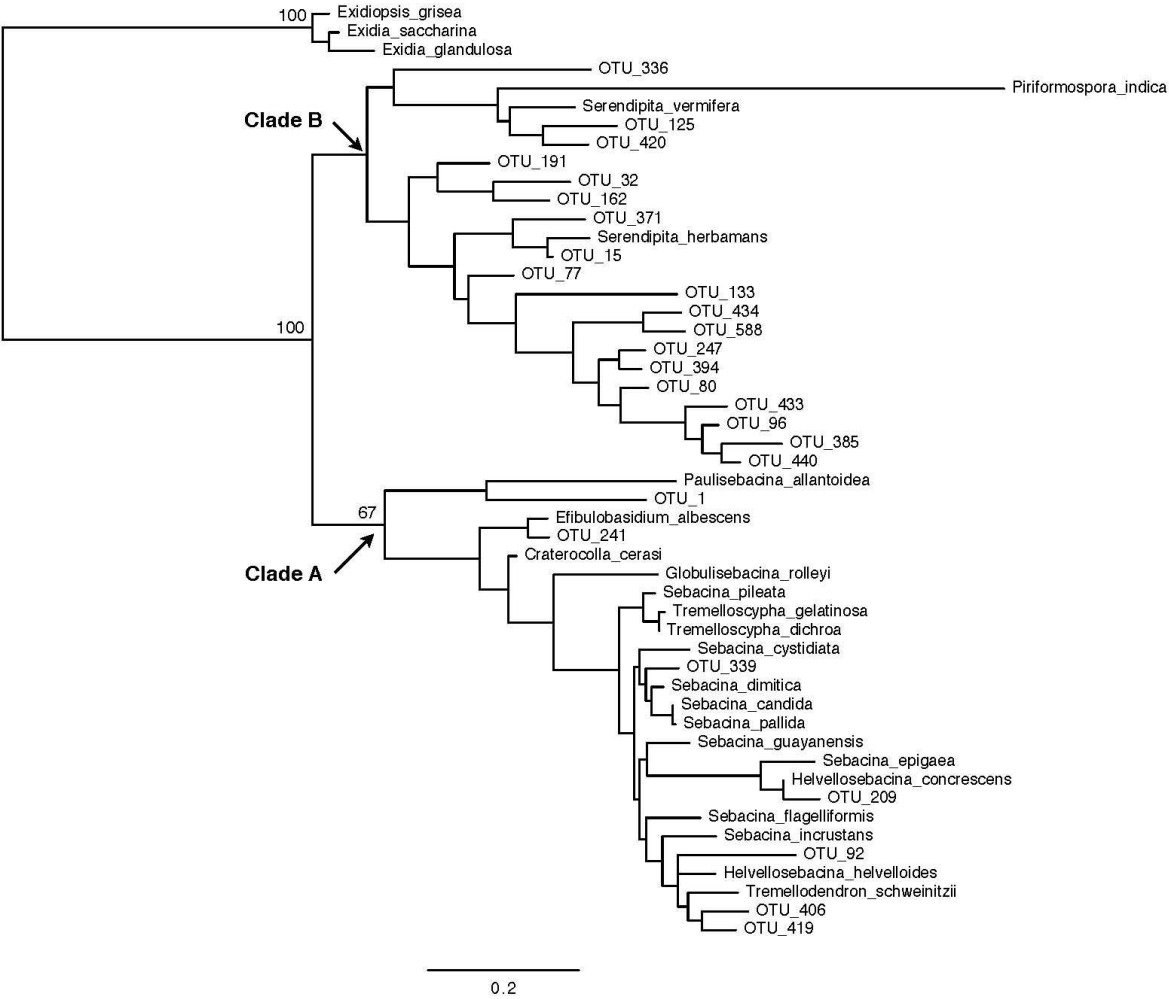

Fig. S4

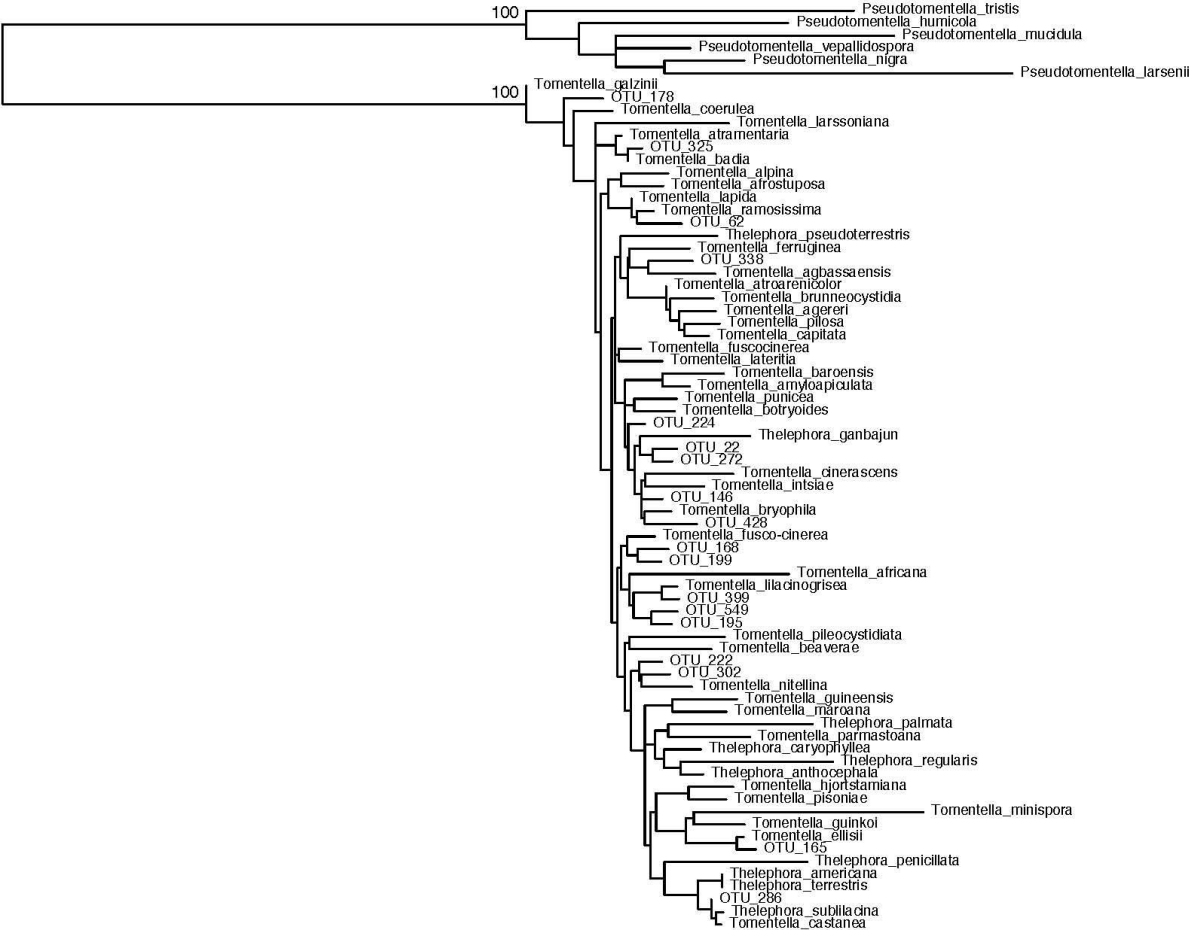

0.3

Fig. S5

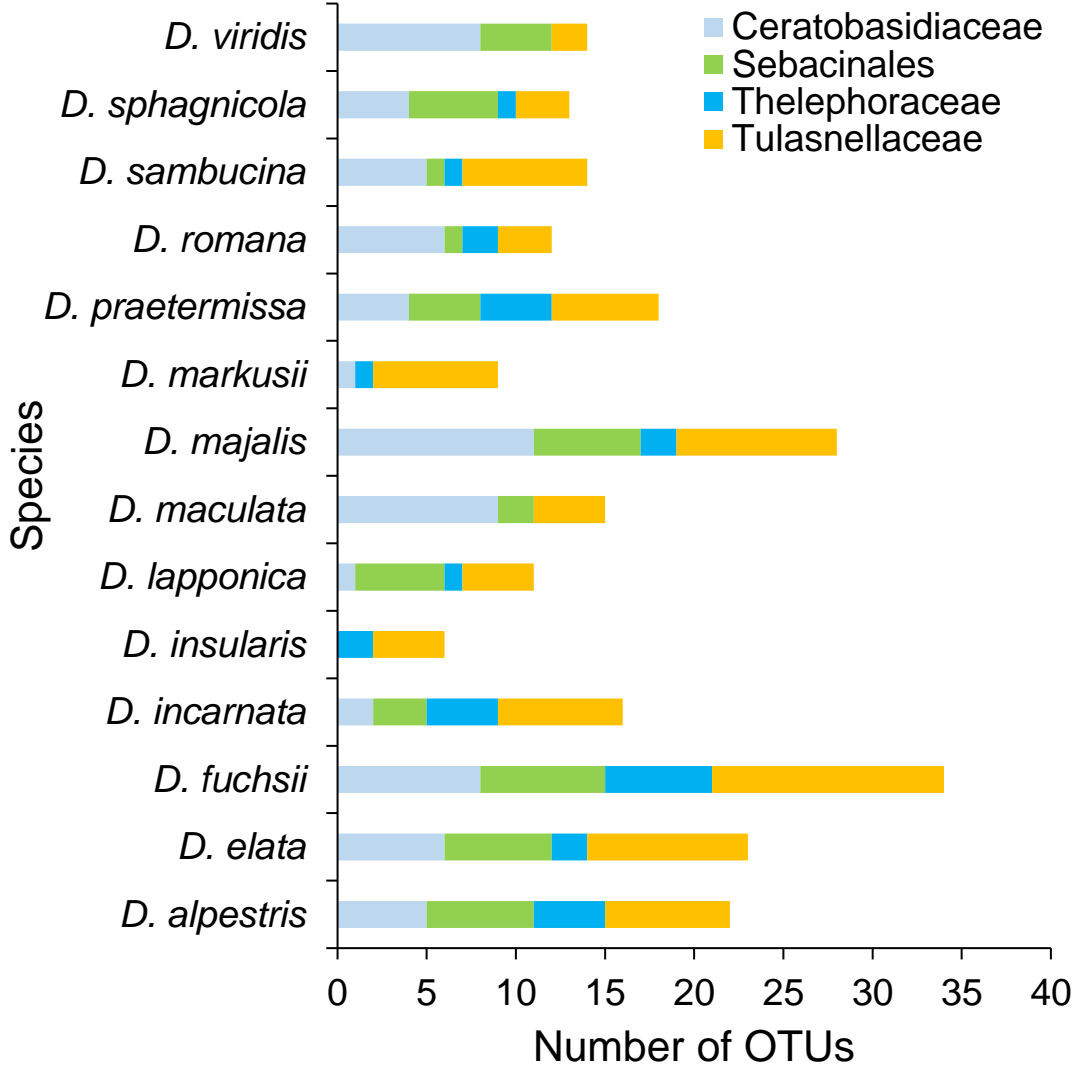



Fig. S6

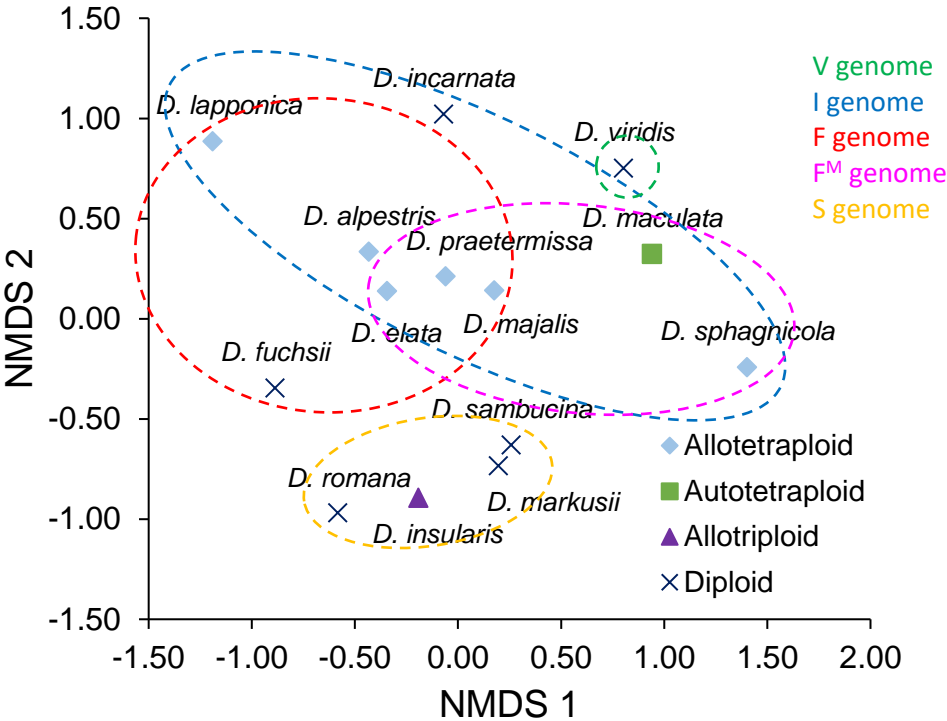

Fig. S7

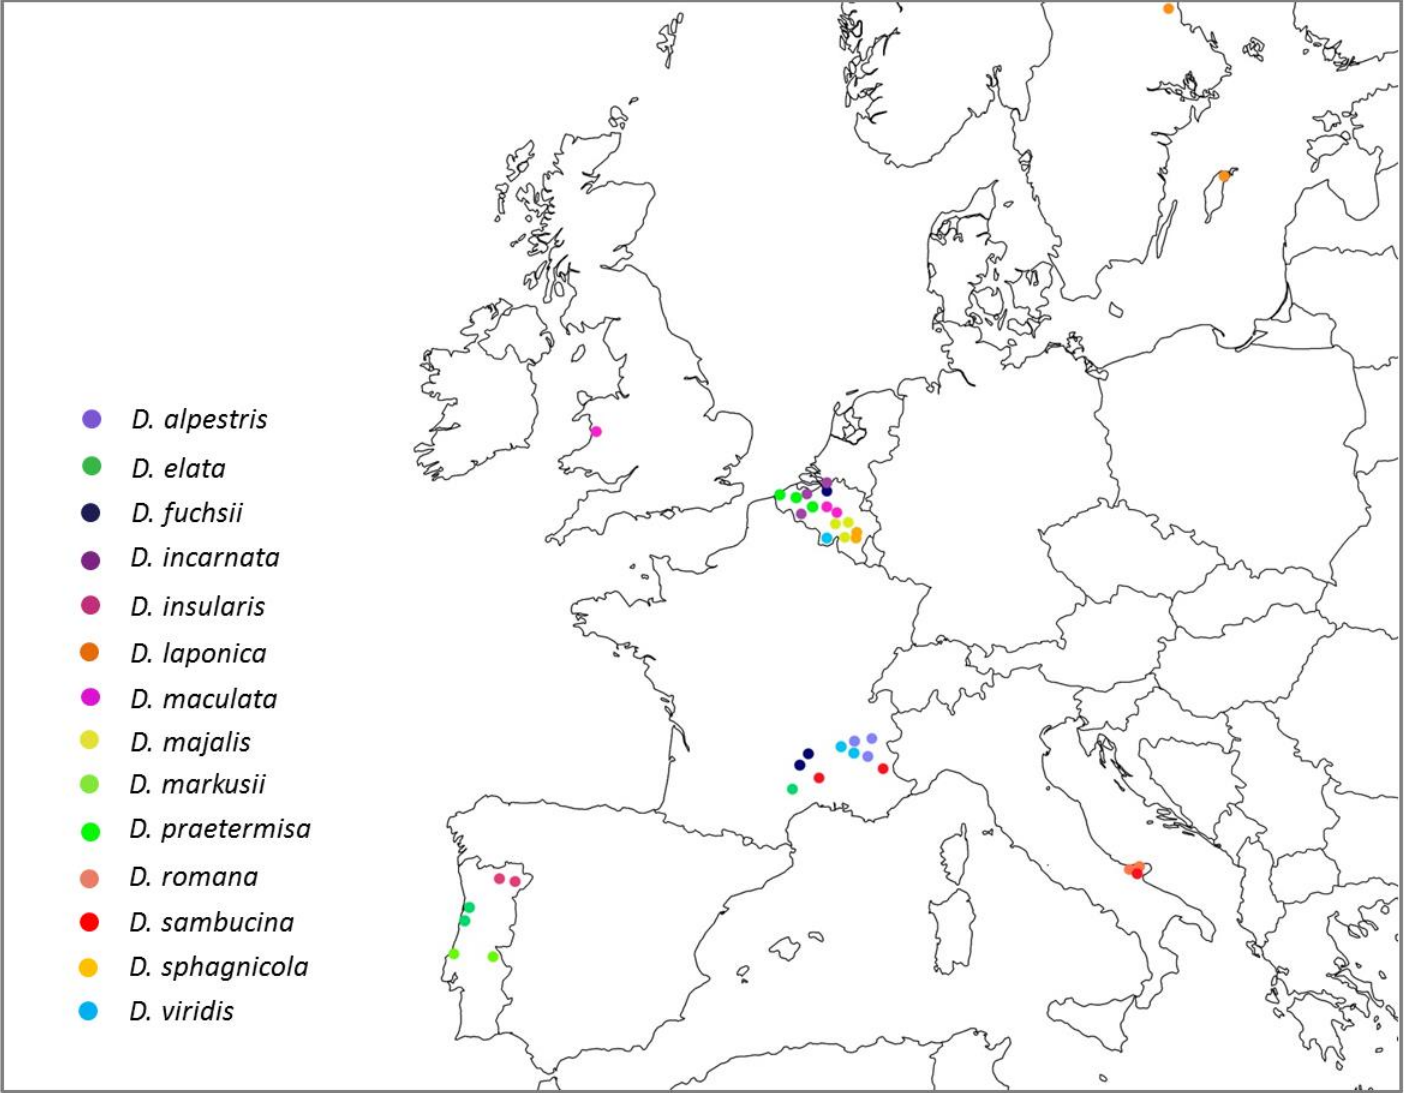

**Table S1**

| OTU Id | # sequences | Family            | Species                                             | Length | Score | E value  | Sequence identity |
|--------|-------------|-------------------|-----------------------------------------------------|--------|-------|----------|-------------------|
| OTU 8  | 6149        | Tulasnellaceae    | Uncultured Tulasnella clone                         | 300    | 532.9 | 3.9E-148 | 98.7%             |
| OTU 4  | 5929        | Tulasnellaceae    | Uncultured mycorrhiza (Tulasnellaceae)              | 311    | 442.5 | 6.8E-121 | 92.9%             |
| OTU 10 | 4620        | Tulasnellaceae    | Uncultured mycorrhiza (Tulasnellaceae)              | 301    | 505.3 | 8.6E-140 | 97.0%             |
| OTU 60 | 4285        | Tulasnellaceae    | Uncultured mycorrhiza (Tulasnellaceae)              | 312    | 475.7 | 6.7E-131 | 94.9%             |
| OTU 1  | 4245        | Sebacinaceae      | Uncultured Sebaciniales clone                       | 301    | 497.9 | 1.4E-137 | 95.7%             |
| OTU 5  | 3623        | Ceratobasidiaceae | Uncultured Ceratobasidiaceae type OTU               | 302    | 521.9 | 8.5E-145 | 98.0%             |
| OTU 18 | 3223        | Tulasnellaceae    | Uncultured Tulasnella isolate GA6b                  | 300    | 549.6 | 3.9E-153 | 99.7%             |
| OTU 3  | 3193        | Ceratobasidiaceae | Ceratobasidium sp. UAMH 5443 18S ribosomal RNA gene | 300    | 555.1 | 8.4E-155 | 100.0%            |
| OTU 11 | 3084        | Ceratobasidiaceae | Uncultured Ceratobasidium clone                     | 301    | 549.6 | 3.9E-153 | 99.7%             |
| OTU 2  | 3025        | Ceratobasidiaceae | Ceratobasidium sp. AG-C genes for ITS1              | 273    | 468.3 | 1.1E-128 | 97.8%             |
| OTU 9  | 2728        | Tulasnellaceae    | Uncultured Tulasnella clone                         | 300    | 549.6 | 3.9E-153 | 99.7%             |
| OTU 7  | 2063        | Tulasnellaceae    | Uncultured Tulasnellaceae clone                     | 294    | 401.8 | 1.2E-108 | 91.5%             |
| OTU 16 | 1615        | Tulasnellaceae    | Uncultured Tulasnella clone                         | 288    | 405.5 | 9.0E-110 | 92.4%             |
| OTU 17 | 1615        | Tulasnellaceae    | Uncultured mycorrhiza (Tulasnellaceae)              | 313    | 425.8 | 6.9E-116 | 92.0%             |
| OTU 21 | 1451        | Ceratobasidiaceae | Ceratobasidium sp. 2 MV-2011                        | 301    | 455.4 | 8.7E-125 | 94.0%             |
| OTU 15 | 1310        | Sebacinaceae      | Uncultured Sebaciniales clone                       | 300    | 547.7 | 1.4E-152 | 99.7%             |
| OTU 24 | 1027        | Tulasnellaceae    | Uncultured Tulasnellaceae clone                     | 293    | 473.9 | 2.4E-130 | 95.9%             |
| OTU19  | 885         | Sebacinaceae      | Uncultured Sebacina mycobiont                       | 301    | 499.7 | 4.0E-138 | 96.7%             |
| OTU 27 | 866         | Ceratobasidiaceae | Uncultured Ceratobasidium clone                     | 290    | 448.0 | 1.5E-122 | 94.8%             |
| OTU 52 | 768         | Tulasnellaceae    | Uncultured Tulasnella clone                         | 277    | 483.1 | 4.0E-133 | 97.5%             |
| OTU 23 | 765         | Tulasnellaceae    | Uncultured Tulasnellaceae isolate                   | 271    | 309.5 | 7.2E-81  | 88.2%             |
| OTU 25 | 730         | Tulasnellaceae    | Uncultured mycorrhiza (Tulasnellaceae)              | 302    | 442.5 | 6.8E-121 | 93.4%             |
| OTU 22 | 700         | Thelephoraceae    | Uncultured Thelephoraceae clone                     | 286    | 514.5 | 1.4E-142 | 99.0%             |
| OTU 26 | 617         | Ceratobasidiaceae | Uncultured Ceratobasidiaceae clone OpaBN01-aab93e01 | 296    | 451.7 | 1.1E-123 | 94.6%             |
| OTU 32 | 530         | Sebacinaceae      | Uncultured Sebacina mycobiont                       | 270    | 475.7 | 6.7E-131 | 98.1%             |
| OTU 31 | 360         | Tulasnellaceae    | Uncultured Tulasnellaceae clone                     | 291    | 516.3 | 3.9E-143 | 98.6%             |
| OTU 43 | 348         | Inocybaceae       | Uncultured fungus isolate                           | 272    | 462.8 | 5.2E-127 | 97.4%             |

|                |     |                   |                                               |     |       |          |        |
|----------------|-----|-------------------|-----------------------------------------------|-----|-------|----------|--------|
| <b>OTU 308</b> | 337 | Tulasnellaceae    | Uncultured Tulasnella clone                   | 281 | 473.9 | 2.4E-130 | 96.8%  |
| <b>OTU 49</b>  | 336 | Tulasnellaceae    | Uncultured Tulasnellaceae isolate             | 271 | 438.8 | 8.8E-120 | 95.9%  |
| <b>OTU 57</b>  | 312 | Ceratobasidiaceae | Uncultured Rhizoctonia isolate                | 291 | 527.4 | 1.8E-146 | 99.3%  |
| <b>OTU 35</b>  | 306 | Clavulinaceae     | Uncultured Agaricales isolate                 | 283 | 436.9 | 3.2E-119 | 95.1%  |
| <b>OTU 76</b>  | 305 | Tulasnellaceae    | Uncultured mycorrhiza (Tulasnellaceae)        | 296 | 532.9 | 3.9E-148 | 98.7%  |
| <b>OTU 48</b>  | 299 | Ceratobasidiaceae | Ceratobasidium sp.                            | 304 | 518.2 | 1.1E-143 | 97.7%  |
| <b>OTU 36</b>  | 291 | Ceratobasidiaceae | Uncultured Ceratobasidiaceae isolate          | 301 | 464.6 | 1.5E-127 | 94.7%  |
| <b>OTU 61</b>  | 257 | Tulasnellaceae    | Uncultured Tulasnellaceae clone               | 311 | 322.4 | 9.3E-85  | 86.2%  |
| <b>OTU 55</b>  | 252 | Tulasnellaceae    | Uncultured Tulasnellaceae clone               | 289 | 492.3 | 6.7E-136 | 96.3%  |
| <b>OTU 140</b> | 246 | Tulasnellaceae    | Uncultured mycorrhiza (Tulasnellaceae)        | 311 | 470.2 | 3.1E-129 | 94.5%  |
| <b>OTU 50</b>  | 221 | Ceratobasidiaceae | Uncultured ectomycorrhiza (Ceratobasidiaceae) | 273 | 490.5 | 2.4E-135 | 98.6%  |
| <b>OTU 581</b> | 204 | Tulasnellaceae    | Uncultured mycorrhiza (Tulasnellaceae)        | 303 | 540.3 | 2.4E-150 | 99.0%  |
| <b>OTU 46</b>  | 202 | Ceratobasidiaceae | Ceratobasidium sp.                            | 291 | 532.9 | 3.9E-148 | 99.7%  |
| <b>OTU 289</b> | 194 | Ceratobasidiaceae | Uncultured Ceratobasidiaceae isolate          | 303 | 466.5 | 4.1E-128 | 94.7%  |
| <b>OTU 62</b>  | 189 | Thelephoraceae    | Uncultured ectomycorrhiza (Thelephoraceae)    | 300 | 532.9 | 3.9E-148 | 98.7%  |
| <b>OTU 72</b>  | 188 | Tulasnellaceae    | Uncultured Tulasnellaceae isolate             | 278 | 514.5 | 1.4E-142 | 100.0% |
| <b>OTU 56</b>  | 176 | Tulasnellaceae    | Uncultured Tulasnellaceae clone               | 295 | 440.6 | 2.5E-120 | 93.9%  |
| <b>OTU 79</b>  | 176 | Armillaria        | Uncultured fungus clone                       | 304 | 411.1 | 1.9E-111 | 91.8%  |
| <b>OTU 67</b>  | 163 | Sebacinaceae      | Uncultured Sebacina clone                     | 300 | 544.0 | 1.8E-151 | 99.3%  |
| <b>OTU 53</b>  | 150 | Ceratobasidiaceae | Ceratobasidium sp.                            | 262 | 348.3 | 1.5E-92  | 91.6%  |
| <b>OTU 82</b>  | 130 | Ceratobasidiaceae | Ceratobasidium sp.                            | 291 | 538.5 | 8.5E-150 | 100.0% |
| <b>OTU 96</b>  | 130 | Sebacinaceae      | Uncultured Sebacina isolate                   | 301 | 470.2 | 3.1E-129 | 95.0%  |
| <b>OTU 63</b>  | 129 | Ceratobasidiaceae | Uncultured Basidiomycota clone                | 300 | 549.5 | 3.9E-153 | 99.7%  |
| <b>OTU 174</b> | 116 | Ceratobasidiaceae | Ceratobasidium sp. AG-Ba isolate              | 309 | 350.1 | 4.3E-93  | 88.7%  |
| <b>OTU 81</b>  | 107 | Ceratobasidiaceae | Uncultured Ceratobasidiaceae clone            | 302 | 473.9 | 2.4E-130 | 95.0%  |
| <b>OTU 80</b>  | 106 | Sebacinaceae      | Uncultured Sebacina                           | 297 | 459.1 | 6.8E-126 | 94.9%  |
| <b>OTU 77</b>  | 90  | Sebacinaceae      | Sebacina vermifera partial 18S rRNA           | 301 | 499.7 | 4.0E-138 | 96.7%  |
| <b>OTU 75</b>  | 89  | Ceratobasidiaceae | Uncultured Rhizoctonia                        | 300 | 555.1 | 8.4E-155 | 100.0% |
| <b>OTU 91</b>  | 79  | Ceratobasidiaceae | Ceratobasidium sp.                            | 301 | 460.9 | 1.9E-126 | 94.4%  |
| <b>OTU 106</b> | 76  | Tulasnellaceae    | Uncultured Tulasnellaceae clone               | 291 | 538.5 | 8.5E-150 | 100.0% |

|                |    |                   |                                            |     |       |          |        |
|----------------|----|-------------------|--------------------------------------------|-----|-------|----------|--------|
| <b>OTU 92</b>  | 68 | Sebacinaceae      | Uncultured Sebaciniales clone              | 279 | 505.3 | 8.6E-140 | 99.3%  |
| <b>OTU 102</b> | 66 | Ceratobasidiaceae | Uncultured Ceratobasidiaceae isolate       | 304 | 472.0 | 8.7E-130 | 95.1%  |
| <b>OTU 123</b> | 65 | Clavulinaceae     | Uncultured Agaricomycetes clone            | 274 | 435.1 | 1.1E-118 | 95.6%  |
| <b>OTU 112</b> | 62 | Cortinariaceae    | Uncultured Cortinarius clone               | 300 | 549.6 | 3.9E-153 | 99.7%  |
| <b>OTU 133</b> | 61 | Sebacinaceae      | Uncultured Sebacina isolate                | 300 | 555.1 | 8.4E-155 | 100.0% |
| <b>OTU 125</b> | 60 | Sebacinaceae      | Sebacina vermifera strain                  | 308 | 381.5 | 1.5E-102 | 89.6%  |
| <b>OTU 144</b> | 56 | Tulasnellaceae    | Uncultured Tulasnella voucher              | 300 | 549.6 | 3.9E-153 | 99.7%  |
| <b>OTU 176</b> | 48 | Tulasnellaceae    | Uncultured Tulasnellaceae clone            | 292 | 529.3 | 5.1E-147 | 99.3%  |
| <b>OTU 104</b> | 42 | Inocybaceae       | Inocybe petiginosa                         | 300 | 555.1 | 8.7E-130 | 100.0% |
| <b>OTU 138</b> | 38 | Agaricaceae       | Coprinopsis argentea strain                | 260 | 468.3 | 1.1E-128 | 99.2%  |
| <b>OTU 161</b> | 37 | Clavulinaceae     | Uncultured Agaricales isolate              | 279 | 516.3 | 3.9E-143 | 100.0% |
| <b>OTU 156</b> | 35 | Marasmius         | Uncultured ascomycete clone                | 300 | 544.0 | 1.8E-151 | 99.3%  |
| <b>OTU 162</b> | 35 | Sebacinaceae      | Sebacina vermifera isolate                 | 303 | 512.6 | 5.1E-142 | 97.4%  |
| <b>OTU 165</b> | 34 | Thelephoraceae    | Uncultured Thelephoraceae                  | 272 | 507.1 | 2.4E-140 | 97.9%  |
| <b>OTU 135</b> | 31 | Ceratobasidiaceae | Uncultured Ceratobasidium clone            | 300 | 549.6 | 3.9E-153 | 99.7%  |
| <b>OTU 169</b> | 28 | Sebacinaceae      | Uncultured Sebaciniales clone              | 276 | 505.3 | 8.6E-140 | 99.6%  |
| <b>OTU 136</b> | 25 | Ceratobasidiaceae | Ceratobasidium sp.                         | 280 | 466.5 | 4.1E-128 | 96.8%  |
| <b>OTU 171</b> | 24 | Inocybaceae       | Uncultured ectomycorrhizal fungus clone    | 300 | 542.2 | 6.6E-151 | 99.3%  |
| <b>OTU 146</b> | 23 | Thelephoraceae    | Uncultured Tomentella genomic DNA          | 300 | 555.1 | 8.4E-155 | 100.0% |
| <b>OTU 240</b> | 22 | Ceratobasidiaceae | Thanatephorus cucumeris                    | 300 | 453.5 | 3.2E-124 | 94.3%  |
| <b>OTU 158</b> | 21 | Ceratobasidiaceae | Uncultured Ceratobasidiaceae clone         | 301 | 521.9 | 8.5E-145 | 98.0%  |
| <b>OTU 222</b> | 19 | Thelephoraceae    | Uncultured ectomycorrhizal fungus clone    | 300 | 533.0 | 3.9E-148 | 98.7%  |
| <b>OTU 224</b> | 19 | Thelephoraceae    | Thelephoraceae sp.                         | 301 | 527.4 | 1.8E-146 | 98.3%  |
| <b>OTU 270</b> | 19 | Tulasnellaceae    | Uncultured Tulasnellaceae clone            | 288 | 516.3 | 4.0E-143 | 99.0%  |
| <b>OTU 191</b> | 18 | Sebacinaceae      | Uncultured Sebacina mycobiont              | 300 | 532.9 | 3.9E-148 | 98.0%  |
| <b>OTU 195</b> | 18 | Thelephoraceae    | Uncultured ectomycorrhiza (Thelephoraceae) | 300 | 555.1 | 8.4E-155 | 100.0% |
| <b>OTU 272</b> | 17 | Thelephoraceae    | Uncultured Tomentella genomic DNA          | 300 | 544.0 | 1.8E-151 | 99.3%  |
| <b>OTU 345</b> | 17 | Ceratobasidiaceae | Ceratobasidium sp. AG-A isolate            | 291 | 533.0 | 3.9E-148 | 99.7%  |
| <b>OTU 159</b> | 16 | Psathyrellaceae   | Psathyrella sp.                            | 302 | 424.0 | 2.5E-115 | 92.4%  |
| <b>OTU 249</b> | 15 | Ceratobasidiaceae | Ceratobasidium sp.                         | 301 | 499.7 | 4.0E-138 | 96.7%  |

|                |    |                   |                                                 |     |       |          |        |
|----------------|----|-------------------|-------------------------------------------------|-----|-------|----------|--------|
| <b>OTU 302</b> | 15 | Thelephoraceae    | Uncultured Thelephoraceae clone                 | 301 | 549.6 | 3.9E-153 | 99.7%  |
| <b>OTU 181</b> | 14 | Tricholomataceae  | Uncultured Mycena clone                         | 302 | 499.7 | 4.0E-138 | 96.7%  |
| <b>OTU 275</b> | 14 | Tulasnellaceae    | Uncultured Tulasnella mycobiont                 | 300 | 532.9 | 3.9E-148 | 98.7%  |
| <b>OTU 178</b> | 13 | Thelephoraceae    | Uncultured ectomycorrhiza (Tomentella)          | 280 | 518.2 | 1.1E-143 | 100.0% |
| <b>OTU 223</b> | 13 | Inocybaceae       | Uncultured Inocybe genomic DNA                  | 300 | 555.1 | 8.4E-155 | 100.0% |
| <b>OTU 168</b> | 12 | Thelephoraceae    | Uncultured ectomycorrhiza (Thelephoraceae)      | 300 | 532.9 | 3.9E-148 | 98.7%  |
| <b>OTU 209</b> | 12 | Sebacinaceae      | Uncultured Sebacinales clone                    | 273 | 457.2 | 2.4E-125 | 97.1%  |
| <b>OTU 210</b> | 12 | Inocybaceae       | Inocybe malenconii                              | 300 | 555.1 | 8.4E-155 | 100.0% |
| <b>OTU 241</b> | 12 | Sebacinaceae      | Uncultured Sebacina isolate                     | 300 | 555.1 | 8.4E-155 | 100.0% |
| <b>OTU 314</b> | 12 | Ceratobasidiaceae | Uncultured Ceratobasidiaceae isolate            | 300 | 525.6 | 6.6E-140 | 98.3%  |
| <b>OTU 399</b> | 12 | Thelephoraceae    | Tomentella sp. ECM 21                           | 300 | 510.8 | 1.8E-148 | 97.3%  |
| <b>OTU 199</b> | 11 | Thelephoraceae    | Uncultured ectomycorrhiza (Thelephoraceae)      | 301 | 509.0 | 6.6E-141 | 97.3%  |
| <b>OTU 247</b> | 11 | Sebacinaceae      | Uncultured Sebacina clone                       | 301 | 527.4 | 1.8E-146 | 98.3%  |
| <b>OTU 269</b> | 11 | Tricholomataceae  | Mycena maurella voucher                         | 300 | 544.0 | 1.8E-151 | 99.3%  |
| <b>OTU 297</b> | 10 | Clavulinaceae     | Uncultured Agaricomycetes clone                 | 275 | 466.5 | 4.1E-128 | 97.5%  |
| <b>OTU 250</b> | 9  | Sebacinaceae      | Uncultured Sebacina isolate                     | 279 | 494.2 | 1.9E-136 | 98.6%  |
| <b>OTU 439</b> | 9  | Atractiella       | Uncultured endophytic fungus clone              | 188 | 348.3 | 1.5E-92  | 100.0% |
| <b>OTU 232</b> | 8  | Sebacinaceae      | Uncultured Sebacina mycobiont                   | 305 | 464.6 | 1.5E-127 | 94.4%  |
| <b>OTU 366</b> | 8  | Agaricaceae       | Uncultured soil basidiomycete isolate           | 301 | 549.6 | 3.9E-153 | 99.7%  |
| <b>OTU 395</b> | 8  | Inocybaceae       | Uncultured Inocybe genomic DNA                  | 300 | 531.1 | 1.4E-147 | 98.7%  |
| <b>OTU 519</b> | 8  | Psathyrellaceae   | Psathyrella typhae                              | 300 | 529.3 | 5.1E-147 | 98.7%  |
| <b>OTU 287</b> | 7  | Sebacinaceae      | Uncultured Sebacinaceae clone                   | 273 | 418.5 | 1.2E-113 | 94.5%  |
| <b>OTU 414</b> | 7  | Clavulinaceae     | Uncultured fungus clone                         | 303 | 457.2 | 2.4E-125 | 94.4%  |
| <b>OTU 316</b> | 6  | Tulasnellaceae    | Uncultured Tulasnellaceae clone                 | 160 | 296.6 | 5.6E-77  | 100.0% |
| <b>OTU 357</b> | 6  | Ceratobasidiaceae | Uncultured Ceratobasidiaceae isolate            | 302 | 436.9 | 3.2E-119 | 93.0%  |
| <b>OTU 370</b> | 6  | Cortinariaceae    | Uncultured ectomycorrhiza (Cortinarius) clone   | 302 | 510.8 | 1.8E-141 | 97.4%  |
| <b>OTU 273</b> | 5  | Thelephoraceae    | Uncultured ectomycorrhiza (Tomentella) clone    | 291 | 514.5 | 1.4E-142 | 98.6%  |
| <b>OTU 274</b> | 5  | Tricholomataceae  | Uncultured Cortinarius genomic DNA              | 300 | 529.3 | 5.1E-147 | 98.7%  |
| <b>OTU 280</b> | 5  | Clavulinaceae     | Uncultured ectomycorrhiza (Clavulinaceae) clone | 302 | 529.3 | 5.1E-147 | 98.3%  |
| <b>OTU 286</b> | 5  | Thelephoraceae    | Uncultured Tomentella genomic DNA               | 300 | 555.1 | 8.4E-155 | 100.0% |

|                |   |                   |                                                |     |       |          |        |
|----------------|---|-------------------|------------------------------------------------|-----|-------|----------|--------|
| <b>OTU 336</b> | 5 | Sebacinaceae      | Uncultured Sebacinaceae clone                  | 250 | 226.4 | 7.5E-56  | 80.4%  |
| <b>OTU 339</b> | 5 | Sebacinaceae      | Uncultured Sebacina isolate                    | 300 | 521.9 | 8.5E-145 | 98.0%  |
| <b>OTU 391</b> | 5 | Ceratobasidiaceae | Uncultured Ceratobasidiaceae isolate           | 294 | 483.1 | 4.0E-133 | 96.6%  |
| <b>OTU 419</b> | 5 | Sebacinaceae      | Uncultured Sebacina isolate                    | 300 | 544.0 | 1.8E-151 | 99.3%  |
| <b>OTU 420</b> | 5 | Sebacinaceae      | Sebacina vermifera strain                      | 312 | 374.1 | 2.5E-100 | 89.1%  |
| <b>OTU 433</b> | 5 | Sebacinaceae      | Uncultured Sebaciniales clone                  | 298 | 470.2 | 3.1E-129 | 95.3%  |
| <b>OTU 495</b> | 5 | Tulasnellaceae    | Uncultured Tulasnellaceae clone OmiA           | 291 | 532.9 | 3.9E-148 | 99.7%  |
| <b>OTU 325</b> | 4 | Thelephoraceae    | Uncultured ectomycorrhiza (Tomentella) isolate | 300 | 549.6 | 3.9E-153 | 99.7%  |
| <b>OTU 331</b> | 4 | Ceratobasidiaceae | Uncultured Ceratobasidiaceae type OTU          | 301 | 516.3 | 4.0E-143 | 97.7%  |
| <b>OTU 338</b> | 4 | Thelephoraceae    | Thelephoraceae sp.                             | 300 | 533.0 | 3.9E-148 | 98.7%  |
| <b>OTU 385</b> | 4 | Sebacinaceae      | Uncultured Sebaciniales                        | 300 | 481.2 | 1.4E-132 | 95.7%  |
| <b>OTU 580</b> | 4 | Inocybaceae       | Inocybe praetervisa isolate                    | 301 | 549.6 | 3.9E-153 | 99.7%  |
| <b>OTU 371</b> | 3 | Sebacinaceae      | Uncultured Sebacina isolate                    | 300 | 540.3 | 2.4E-150 | 99.0%  |
| <b>OTU 394</b> | 3 | Sebacinaceae      | Uncultured Sebacina mycobiont                  | 300 | 555.1 | 8.4E-155 | 100.0% |
| <b>OTU 406</b> | 3 | Sebacinaceae      | Uncultured Sebacina isolate                    | 300 | 555.1 | 8.4E-155 | 100.0% |
| <b>OTU 428</b> | 3 | Thelephoraceae    | Uncultured ectomycorrhiza (Thelephoraceae)     | 301 | 427.7 | 1.9E-116 | 92.7%  |
| <b>OTU 434</b> | 3 | Sebacinaceae      | Uncultured Sebacina isolate                    | 307 | 357.5 | 2.5E-95  | 88.3%  |
| <b>OTU 440</b> | 3 | Sebacinaceae      | Uncultured Sebacina isolate                    | 300 | 549.6 | 3.9E-153 | 99.7%  |
| <b>OTU 442</b> | 3 | Tricholomataceae  | Uncultured basidiomycete clone                 | 293 | 414.7 | 1.5E-112 | 92.5%  |
| <b>OTU 459</b> | 3 | Tricholomataceae  | Uncultured cf. Mycena sp. clone                | 300 | 555.1 | 8.4E-155 | 100.0% |
| <b>OTU 506</b> | 3 | Ceratobasidiaceae | Ceratobasidium sp. UAMH                        | 301 | 492.3 | 6.7E-136 | 96.3%  |
| <b>OTU 522</b> | 3 | Ceratobasidiaceae | Uncultured Ceratobasidiaceae isolate           | 302 | 425.8 | 6.9E-116 | 92.4%  |
| <b>OTU 536</b> | 3 | Tricholomataceae  | Mycena vitilis                                 | 300 | 549.6 | 3.9E-153 | 99.7%  |
| <b>OTU 549</b> | 3 | Thelephoraceae    | Uncultured Tomentella clone                    | 300 | 499.7 | 8.4E-138 | 98.7%  |
| <b>OTU 588</b> | 3 | Sebacinaceae      | Uncultured Sebacina isolate                    | 300 | 549.6 | 3.9E-153 | 99.7%  |

**Table S2**

| Species                       | Country    | Sampling site                                   | No. Plants sampled |
|-------------------------------|------------|-------------------------------------------------|--------------------|
| <b><i>D. alpestris</i></b>    | France     | Col Bayard                                      | 3                  |
|                               | France     | Col du Lautaret 1                               | 3                  |
|                               | France     | Col du Lautaret 2                               | 3                  |
| <b><i>D. elata</i></b>        | France     | Avène                                           | 3                  |
|                               | Portugal   | Senhora de Vagos                                | 3                  |
|                               | Portugal   | Santo André                                     | 3                  |
| <b><i>D. fuchsii</i></b>      | France     | Meyrueis 1                                      | 3                  |
|                               | France     | Meyrueis 2                                      | 3                  |
|                               | Belgium    | Hobokense Polder                                | 3                  |
| <b><i>D. incarnata</i></b>    | Belgium    | Westhoek                                        | 3                  |
|                               | Belgium    | Ekers Moeras                                    | 3                  |
|                               | Belgium    | Vaarttaluds (Moen)                              | 3                  |
| <b><i>D. insularis</i></b>    | Portugal   | Mogadouro                                       | 3                  |
|                               | Portugal   | Macedo de Cavaleiros                            | 3                  |
| <b><i>D. lapponica</i></b>    | Sweden     | Hälsningland, Loos parish, locality Långtjärnen | 3                  |
|                               | Sweden     | Gotland, Rute parish, Kauparve                  | 3                  |
| <b><i>D. maculata</i></b>     | Belgium    | Papendel 1                                      | 3                  |
|                               | Belgium    | Vorsdonkbos                                     | 3                  |
|                               | UK (Wales) | Edem                                            | 3                  |
| <b><i>D. majalis</i></b>      | Belgium    | Aardgat (Tienen)                                | 3                  |
|                               | Belgium    | Malendriesbeekvallei (Kerkom)                   | 3                  |
|                               | Belgium    | Revogne                                         | 3                  |
| <b><i>D. markusii</i></b>     | Portugal   | Carvalho                                        | 3                  |
|                               | Portugal   | Castelo de Vide                                 | 3                  |
| <b><i>D. praetermissa</i></b> | Belgium    | Leiemeeerssen                                   | 3                  |
|                               | Belgium    | Gavers Harelbeke                                | 3                  |
|                               | Belgium    | Warandeduinen (Middelkerke)                     | 3                  |



|                              |         |                   |     |
|------------------------------|---------|-------------------|-----|
| <b><i>D. romana</i></b>      | Italy   | Gargano3          | 3   |
|                              | Italy   | Cagnano Varano    | 3   |
| <b><i>D. sambucina</i></b>   | France  | L'Esperou         | 3   |
|                              | France  | Merlette-Orcieres | 3   |
|                              | Italy   | Monte Calvo       | 3   |
| <b><i>D. sphagnicola</i></b> | Belgium | St. Hubert 1      | 3   |
|                              | Belgium | St. Hubert 2      | 3   |
|                              | Belgium | Warinsart         | 3   |
| <b><i>D. viridis</i></b>     | France  | Col de Menée      | 3   |
|                              | France  | Romeyer           | 3   |
|                              | Belgium | Bonnerieu         | 3   |
|                              |         |                   |     |
|                              |         | Total             | 114 |
